# Supplementary material for: Genetic effects on life-history traits in the Glanville fritillary butterfly
Source: PeerJ journal article supplement (doi:10.7717/peerj.3371), 2017-05-25

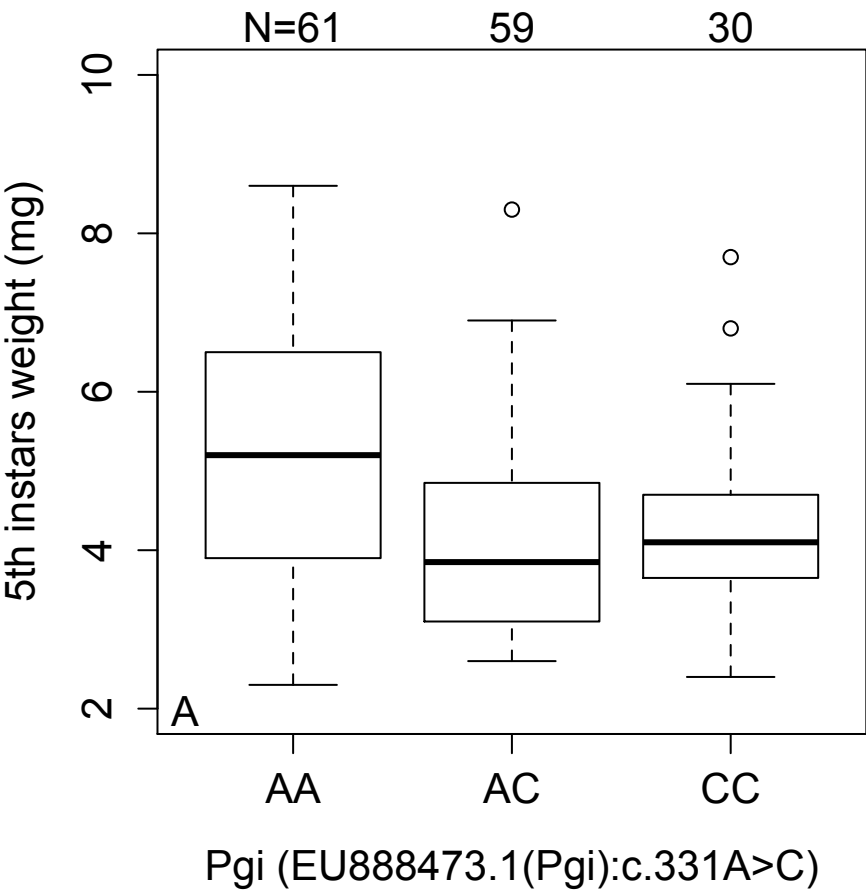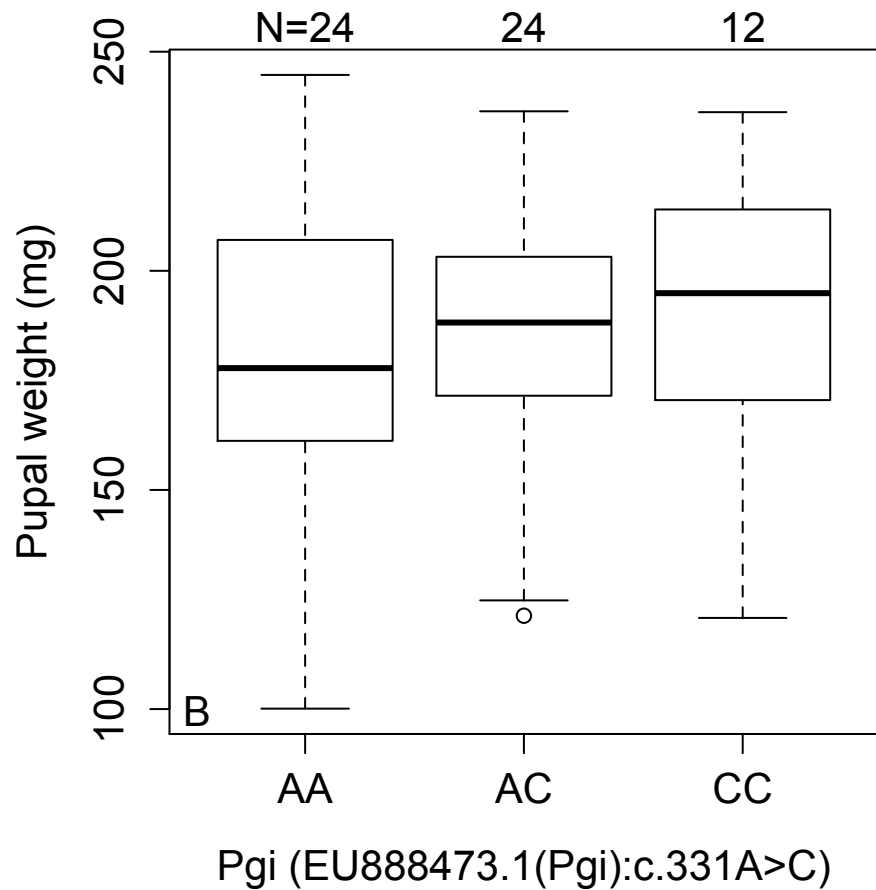

Supplement: FigureS3_PGI+5thWeight2009-PupalW2007.pdf [file FigureS3_PGI%2B5thWeight2009-PupalW2007.pdf]
