# Supplementary material for: Genetic effects on life-history traits in the Glanville fritillary butterfly
Source: PeerJ journal article supplement (doi:10.7717/peerj.3371), 2017-05-25

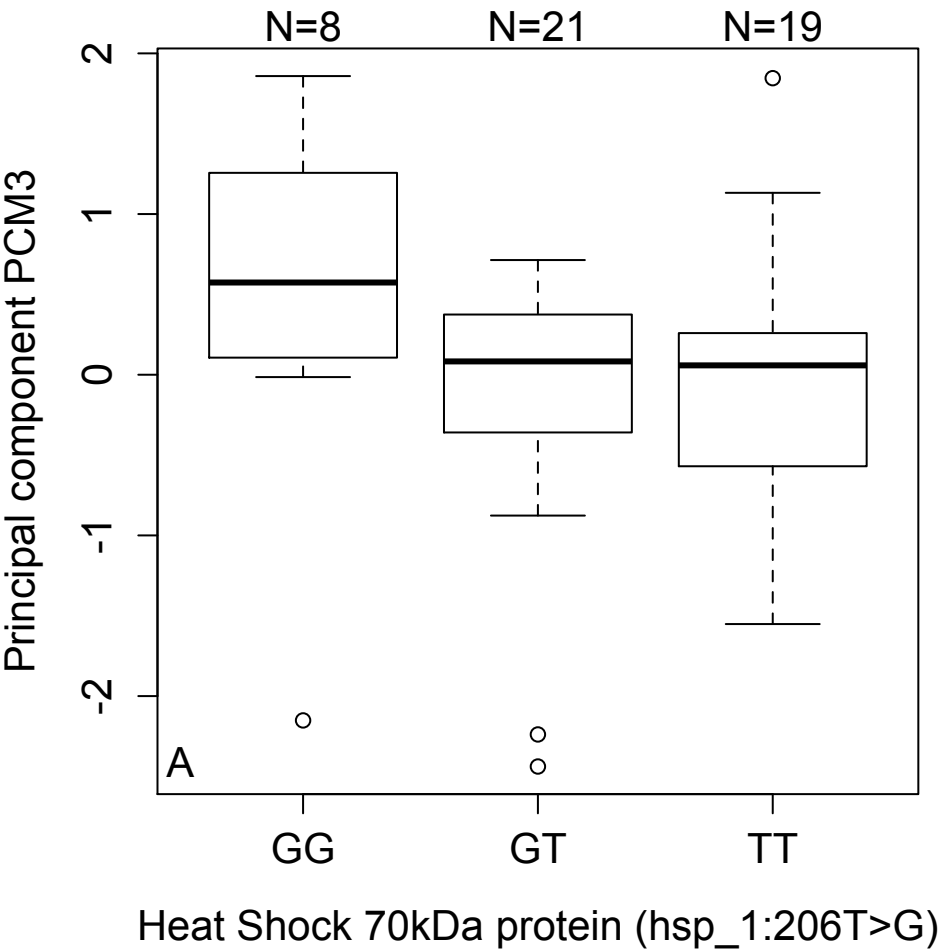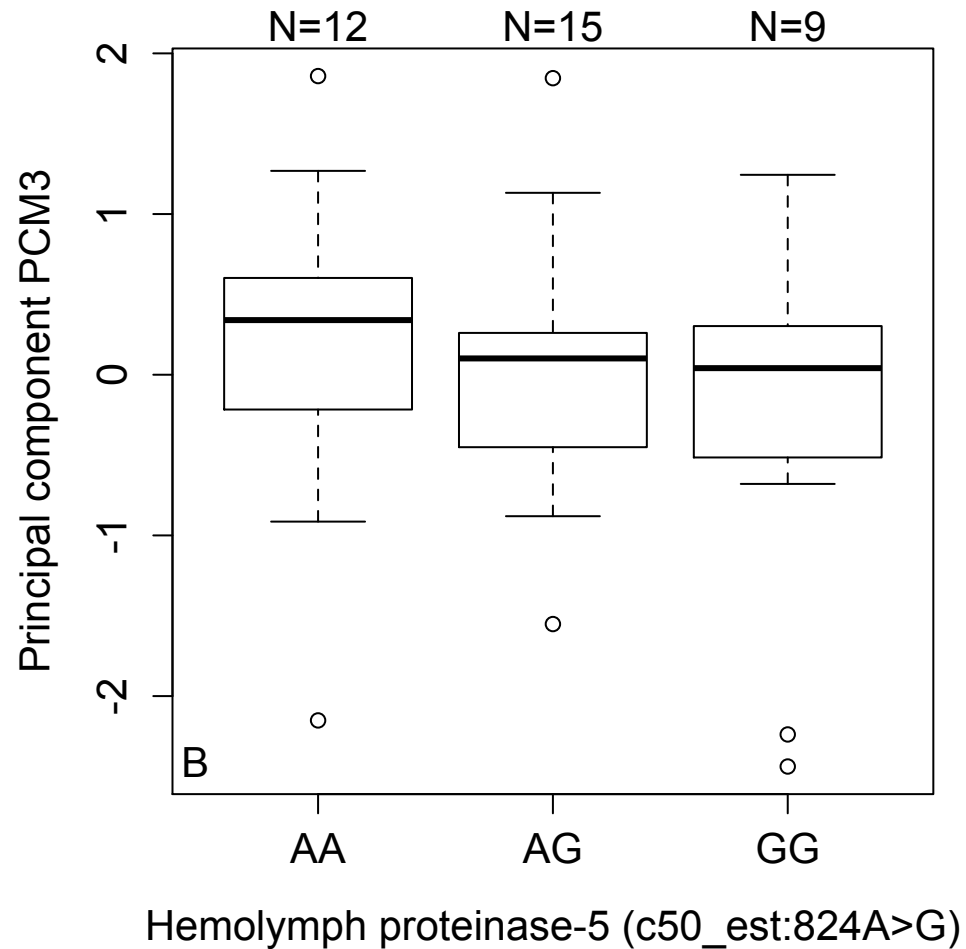

Supplement: FigureS7_HSP+HemolymphVSPCM3.pdf [file FigureS7_HSP%2BHemolymphVSPCM3.pdf]
